# Supplementary material for: Using co-creation focus groups to customise a remote multidomain programme designed to increase dementia literacy
Source: PubMed Central journal article supplement — BMJ Open. 2023 Sep 13;13(9):e074555. doi: 10.1136/bmjopen-2023-074555 (PMC10921908; doi:10.1136/bmjopen-2023-074555), 2023-09-13
Supplement: bmjopen-2023-074555supp001.pdf [file bmjopen-2023-074555supp001.pdf]

| Themes                             | Suggestions/comments                                                                                                                                                                                                                                                                                                                                                                                                                                                                                                                                                                                                                                                                                                                |
|------------------------------------|-------------------------------------------------------------------------------------------------------------------------------------------------------------------------------------------------------------------------------------------------------------------------------------------------------------------------------------------------------------------------------------------------------------------------------------------------------------------------------------------------------------------------------------------------------------------------------------------------------------------------------------------------------------------------------------------------------------------------------------|
| Notebook                           | <ul style="list-style-type: none"> <li>Use the notebook to make an action plan</li> <li>Use the notebook to write out comments</li> <li>Making notebook public vs. private</li> <li>Make notebook available directly in the application (digital notebook)</li> <li>Possibility to have a printable or orderable notebook</li> <li>Receiving a notebook as a "gift" is motivating</li> <li>Could be used as a reward system (notion of progress)</li> </ul>                                                                                                                                                                                                                                                                         |
| Images                             | <ul style="list-style-type: none"> <li>Fostering ethnic diversity</li> <li>Promote body diversity</li> <li>Favoring the diversity of activities</li> <li>Eye-catching and positive images</li> <li>Images allowing for multiple diversities</li> <li>Images with various ethnicities</li> <li>Images with body diversity</li> <li>Image with landscape diversity</li> <li>Image with people with disabilities</li> <li>Realistic rather than idealistic images</li> <li>Using images as an activity</li> <li>Using images as a recruitment tool</li> </ul>                                                                                                                                                                          |
| Questionnaires                     | <ul style="list-style-type: none"> <li>Make the questionnaires more dynamic</li> <li>Present the physical activity questionnaire in a table format</li> <li>Define the concepts at the beginning of the questionnaire</li> <li>Too long</li> <li>Some questions are ambiguous</li> <li>Questions not asked in the right order (have a better distinction between sections)</li> <li>Questions about Alzheimer's are abrupt (may cause anxiety)</li> <li>Two "misleading" questions about Alzheimer's disease</li> <li>Better characterize research questionnaires</li> <li>Put <i>Brain Health Pro</i> questionnaires before research questionnaires</li> <li>Distribute the research questionnaires across the chapters</li> </ul> |
| Interactive activities             | <ul style="list-style-type: none"> <li>Make activities more interactive (social map, interest list)</li> <li>Have more cognitively engaging activities</li> <li>Revisit the complexity of the questions or have multiple levels of complexity</li> <li>Activities that promote the encoding of information</li> <li>Alternate between text and images in the activities</li> <li>Combine quiz and action plan</li> <li>Add a personal or emotional touch to activities</li> <li>Provide optional challenges in addition to the activities</li> </ul>                                                                                                                                                                                |
| Contact with participants (emails) | <ul style="list-style-type: none"> <li>Have an automated newsletter/email</li> <li>Personalize the email with the participant's progress</li> </ul>                                                                                                                                                                                                                                                                                                                                                                                                                                                                                                                                                                                 |

|                                                  |                                                                                                                                                                                                                                                                                                                                                                                                                                                                                                                                                                                                                                                                                                                                                                                                                                                                                                                                                                                                                                                                                                                                                                                                |
|--------------------------------------------------|------------------------------------------------------------------------------------------------------------------------------------------------------------------------------------------------------------------------------------------------------------------------------------------------------------------------------------------------------------------------------------------------------------------------------------------------------------------------------------------------------------------------------------------------------------------------------------------------------------------------------------------------------------------------------------------------------------------------------------------------------------------------------------------------------------------------------------------------------------------------------------------------------------------------------------------------------------------------------------------------------------------------------------------------------------------------------------------------------------------------------------------------------------------------------------------------|
|                                                  | <p>Concrete and to the point emails (not too long)</p> <p>Include positive and critical testimonials in emails</p>                                                                                                                                                                                                                                                                                                                                                                                                                                                                                                                                                                                                                                                                                                                                                                                                                                                                                                                                                                                                                                                                             |
| Contact between participants (social activities) | <p>Addition of online chat</p> <p>Ability to zoom in and out</p> <p>Opportunities for face-to-face meetings</p> <p>Peer support</p> <p>Testimonials from other users</p> <p>Group activity/support groups via municipal libraries</p> <p>Group activity/support groups via community centers</p> <p>Have a group session facilitator</p> <p>Partner organizations offer program and social activities</p> <p>Have a facilitator's guide for group activities</p> <p>Possibility of joining existing organizations</p> <p>Have one meeting with the expert and the facilitator</p> <p>Second meeting to deepen understanding</p> <p>Difficult to follow the groups if people do not start the program at the same time</p> <p>Number of meetings vary according to the modality (virtual vs. face-to-face)</p> <p>Expert vignettes that are recorded and can be listened to before the meeting</p> <p>Time to consider (caregivers have time constraints)</p> <p>Additional activity in the program</p> <p>Order of meetings does not yet follow the order of the modules (because of risk factors)</p> <p>Vary the formula between settings</p> <p>Facilitator Toolkit (with key messages)</p> |
| Gamification                                     | <p>Move more towards a progress vs. a game perspective</p> <p>The score should not be in the foreground</p> <p>Have a progress bar to estimate how long it will take</p> <p>Choice of interface for people who want the fun aspect</p> <p>Point system is not clear</p> <p>We need to explain the reward system, contextualize it</p>                                                                                                                                                                                                                                                                                                                                                                                                                                                                                                                                                                                                                                                                                                                                                                                                                                                          |
| Introductory video                               | <p>Very long</p> <p>Too many details</p> <p>See the module right after the questionnaires and the intro video</p> <p>Make it less complex (keep it simple)</p> <p>Make it more engaging</p> <p>Disperse introductory information over several weeks</p> <p>Possibility to have a glossary</p>                                                                                                                                                                                                                                                                                                                                                                                                                                                                                                                                                                                                                                                                                                                                                                                                                                                                                                  |
| Technical assistance                             | <p>Presence of a webmaster to help participants</p> <p>Presence of frequently asked questions (FAQ)</p>                                                                                                                                                                                                                                                                                                                                                                                                                                                                                                                                                                                                                                                                                                                                                                                                                                                                                                                                                                                                                                                                                        |
| Platform                                         | <p>Keep the platform very simple</p> <p>Unable to change text size in chapters</p> <p>Poorly chosen color contrast/ colors</p>                                                                                                                                                                                                                                                                                                                                                                                                                                                                                                                                                                                                                                                                                                                                                                                                                                                                                                                                                                                                                                                                 |

---

|                 |                                                                                                                                                                                       |
|-----------------|---------------------------------------------------------------------------------------------------------------------------------------------------------------------------------------|
| Search          | Put everything related to the research project in a separate tab<br>Have a dynamic video that explains what people are asked to do in the study                                       |
| Recruiting      | Using images for recruitment<br>Using partnerships to recruit<br>Word of mouth recruitment<br>Recruiting people who are retiring                                                      |
| Data collection | Document the process of how people complete the program<br>Separate questionnaires (individual) and modules (groups)<br>One screen for viewing, but registration for each participant |

---
